# Piezo1 and BK<sub>Ca</sub> channels in human atrial fibroblasts: interplay and remodelling in atrial fibrillation

Short title: Piezo1 and BK<sub>Ca</sub> in AF

Dorothee Jakob,<sup>1,2\*</sup> Alexander Klesen,<sup>1,2\*</sup> Benoit Allegrini,<sup>3</sup> Elisa Darkow,<sup>1,2,4,5</sup> Diana Aria,<sup>1,2,6</sup> Ramona Emig,<sup>1,2,7</sup> Ana Simon Chica,<sup>1,2</sup> Eva A. Rog-Zielinska,<sup>1,2</sup> Tim Guth,<sup>1,2</sup> Friedhelm Beyersdorf,<sup>2,8</sup> Fabian A. Kari,<sup>2,8</sup> Susanne Proksch,<sup>2,6</sup> Stéphane N. Hatem,<sup>9</sup> Matthias Karck,<sup>10</sup> Stephan R. Künzel,<sup>11</sup> Hélène Guizouarn,<sup>3</sup> Constanze Schmidt,<sup>12</sup> Peter Kohl,<sup>1,2,7</sup> Ursula Ravens<sup>1,2</sup> & Rémi Peyronnet<sup>1,2†</sup>

<sup>1</sup>Institute for Experimental Cardiovascular Medicine, University Heart Center Freiburg · Bad Krozingen, Medical Center - University of Freiburg, Germany.

<sup>2</sup>Faculty of Medicine, University of Freiburg, Germany.

<sup>3</sup>CNRS University Cote d'Azur laboratory Institut Biology Valrose, Nice, France

<sup>4</sup>Spemann Graduate School of Biology and Medicine (SGBM), University of Freiburg, Freiburg, Germany

<sup>5</sup>Faculty of Biology, University of Freiburg, Freiburg, Germany

<sup>6</sup>G.E.R.N. Tissue Replacement, Regeneration & Neogenesis, Department of Operative Dentistry and Periodontology, Medical Center - University of Freiburg, Germany.

<sup>7</sup>CIBSS Centre for Integrative Biological Signalling Studies, University of Freiburg, Germany

<sup>8</sup>Department of Cardiovascular Surgery, University Heart Center Freiburg · Bad Krozingen, Medical Center - University of Freiburg, Germany.

<sup>9</sup>Sorbonne University; Assistance Publique-Hôpitaux de Paris, GH Pitié-Salpêtrière Hospital, INSERM UMR\_S1166; Cardiology department, Institute of Cardiometabolism and Nutrition-ICAN, Paris.

<sup>10</sup>Department of Cardiac Surgery, University of Heidelberg, Germany.

<sup>11</sup>Institute of Pharmacology and Toxicology, Faculty of Medicine Carl Gustav Carus, Technische Universität Dresden, Germany

<sup>12</sup>Department of Cardiology, University of Heidelberg, Germany; and DZHK (German Center for Cardiovascular Research) partner site Heidelberg / Mannheim, University of Heidelberg, Germany.

\*These authors contributed equally to the work.

†To whom correspondence should be addressed:

Dr. Rémi Peyronnet  
Institute for Experimental Cardiovascular Medicine,  
Elsässer Straße 2q,  
D-79110 Freiburg  
Germany  
[remi.peyronnet@universitaets-herzzentrum.de](mailto:remi.peyronnet@universitaets-herzzentrum.de)

48  
49  
50  
51  
52  
53  
54  
55  
56  
57  
58  
  
59  
60  
61  
62  
63  
64  
65  
66  
67  
68  
69  
70  
71  
  
72  
73  
74  
75  
76  
77  
78  
79  
  
80  
81  
82  
83  
84  
85

## **Abstract**

### **Aims**

Atrial Fibrillation (AF) is an arrhythmia of increasing prevalence in the aging population of developed countries. One of the important indicators of AF is sustained atrial dilatation, highlighting the importance of mechanical overload in the pathophysiology of AF. The mechanisms by which atrial cells, including fibroblasts, sense and react to changing mechanical forces, are not fully elucidated. Here, we characterise stretch-activated ion channels (SAC) in human atrial fibroblasts and changes in SAC-presence and -activity associated with AF.

### **Methods and Results**

Using primary cultures of human atrial fibroblasts, isolated from patients in sinus rhythm or sustained AF, we combine electrophysiological, molecular and pharmacological tools to identify SAC. Two electrophysiological SAC-signatures were detected, indicative of cation-nonspecific and potassium-selective channels. Using siRNA-mediated knockdown, we identified the nonspecific SAC as Piezo1. Biophysical properties of the potassium-selective channel, its sensitivity to calcium, paxilline and iberiotoxin (blockers), and NS11021 (activator), indicated presence of calcium-dependent 'big potassium channels', BK<sub>Ca</sub>. In cells from AF patients, Piezo1 activity and mRNA expression levels were higher than in cells from sinus rhythm patients, while BK<sub>Ca</sub> activity (but not expression) was downregulated. Both Piezo1-knockdown and removal of extracellular calcium from the patch pipette resulted in a significant reduction of BK<sub>Ca</sub> current during stretch. No co-immunoprecipitation of Piezo1 and BK<sub>Ca</sub> was detected.

### **Conclusions**

Human atrial fibroblasts contain at least two types of ion channels that are activated during stretch: Piezo1 and BK<sub>Ca</sub>. While Piezo1 is directly stretch-activated, the increase in BK<sub>Ca</sub> activity during mechanical stimulation appears to be mainly secondary to calcium influx *via* SAC such as Piezo1. During sustained AF, Piezo1 is increased, while BK<sub>Ca</sub> activity is reduced, highlighting differential regulation of both channels. Our data support the presence and interplay of Piezo1 and BK<sub>Ca</sub> in human atrial fibroblasts in the absence of physical interactions between the two channel proteins.

**Word count:** abstract 299, whole document 10670.

**Keywords:** Stretch-activated ion channels, mechano-sensing, heart, arrhythmia, non-myocytes, calcium, Slo1

## 86 **1. Introduction**

87 Atrial Fibrillation (AF) is a supraventricular arrhythmia with increasing prevalence in countries  
88 with an aging population. Although AF is one of the most common cardiovascular causes of  
89 hospitalization,<sup>1-3</sup> its pathophysiology is not fully elucidated, and it represents an unmet need  
90 for effective prevention and treatment. One hallmark of AF is its progressive nature. As AF  
91 becomes increasingly resistant over time to pharmacological or electrical attempts at  
92 conversion back to sinus rhythm (SR),<sup>2</sup> atrial tissue undergoes pronounced remodelling.<sup>2, 4</sup>  
93 Structural and functional changes involve cell electrophysiological and tissue morphological  
94 alterations. Whilst electrical remodelling of atrial cardiomyocytes is characterized by a  
95 shortening in action potential duration and of effective refractory period, as well as by  
96 impaired adaptation of these parameters to changes in heart rate,<sup>5</sup> fibrosis – a prominent  
97 feature of AF-related structural remodelling – may in parallel contribute to slowing of  
98 conduction. The combination of short effective refractory period and slow conduction favours  
99 maintenance of AF *via* re-entry mechanism.<sup>6</sup>

100 Many of the risk factors for AF, *e.g.* heart failure, hypertension, or valvulopathies, are  
101 accompanied by mechanical overload of the atria.<sup>7</sup> Since stretch enhances the susceptibility  
102 to AF induction,<sup>8, 9</sup> it has been suggested, that mechanical overload may contribute to  
103 initiation and perpetuation of AF *in vivo*.<sup>10-13</sup> In addition, acute stretch of control atrial tissue  
104 induces complex and regionally varying changes in action potential shape,<sup>10</sup> and diastolic  
105 depolarization which can trigger extrasystoles.<sup>9, 14, 15</sup> This ‘mechano-electric feedback’<sup>16, 17</sup>  
106 requires cells to be able to sense their mechanical environment, and to translate this into an  
107 electrophysiologically relevant signal.

108 Ample evidence points to an essential role of stretch-activated ion channels (SAC) as  
109 mechano-sensors in cardiomyocytes (for reviews see <sup>18, 19</sup>). SAC are also present and  
110 functional in human atrial fibroblasts,<sup>20, 21</sup> but it is currently not known whether SAC function  
111 is altered in AF in human heart cells, especially in fibroblasts, which are key players in  
112 fibrosis. Therefore, the aim of this study was to compare SAC function in atrial fibroblasts  
113 from patients in SR and sustained AF. The cation-nonspecific SAC Piezo1<sup>22-24</sup> forms a  
114 plausible candidate, in line with recently reported Piezo1 effects on remodelling of non-  
115 cardiac tissues.<sup>25</sup> A second candidate, the potassium-selective Ca<sup>2+</sup>-activated channel of  
116 large conductance (BK<sub>Ca</sub>), has been reported to respond to stretch, local Ca<sup>2+</sup> concentration  
117 changes, TGF- $\beta$ , and angiotensin II in several cardiac cell types.<sup>26-30</sup> BK<sub>Ca</sub> is further known to  
118 modulate fibroblast proliferation,<sup>31</sup> a critical event during pathological tissue remodelling in  
119 AF. Both Piezo1 and BK<sub>Ca</sub> have previously been detected in human atrial fibroblasts.<sup>31-33</sup>

120 In this study we report AF-related changes in Piezo1 and BK<sub>Ca</sub> channel activity in human  
121 atrial fibroblasts, and establish functional interactions between the two channel types.

122

## 123 **2. Material and Methods**

### 124 **2.1 Tissue collection**

125 Tissue samples were obtained from the right atrial appendage of patients undergoing open-  
126 heart surgery at the University Heart Center Freiburg · Bad Krozingen. Patients were either in  
127 SR, or in sustained AF (which includes patients with persistent, long-standing persistent and  
128 permanent AF, defined according to ESC Guidelines).<sup>34</sup> Tissue samples were processed by  
129 the Cardiovascular Biobank of the University Heart Center Freiburg · Bad Krozingen  
130 (approved by the ethics committee of Freiburg University, No 393/16; 214/18) or the Clinical  
131 Center of the Medical Faculty Heidelberg (approved by the ethics committee of the University  
132 Heidelberg, S-017/2013). Upon excision in the operating theatre, tissue was placed in room-  
133 temperature cardioplegic solution (containing in [mmol/L]: NaCl 120, KCl 25, HEPES 10,  
134 glucose 10, MgCl<sub>2</sub> 1; pH 7.4, 300 mOsm/L) and immediately transported to the laboratory.  
135 Tissue was processed within 30 min of excision. Samples from 36 SR patients and 17 AF

136 patients (mean age  $64.8 \pm 1.4$  years [mean  $\pm$  standard error of the mean, SEM], age range  
 137 38 - 83 years, 40 males, 13 females were used (Table 1). No significant age differences  
 138 between the two groups were observed. Left atrial diameter of AF patients was larger,  
 139 compared to SR patients. All patients gave informed consent prior to inclusion in the study,  
 140 and investigations conformed to the principles outlined in the Declaration of Helsinki.

141  
 142  
 143

**Table 1: Patient characteristics**

|                                                           | SR                               | AF                               | P<br>(AF vs. SR) |
|-----------------------------------------------------------|----------------------------------|----------------------------------|------------------|
| Number of patients (male/female)                          | 36 (28 M / 8 F)                  | 17 (12 M / 5 F)                  |                  |
| Age at time of surgery (years)                            | 62.3 $\pm$ 10.7                  | 70.2 $\pm$ 6.7                   | 0.172            |
| ASA Stage                                                 | 3.5 $\pm$ 0.5                    | 3.6 $\pm$ 0.5                    | 0.440            |
| BMI (kg/m <sup>2</sup> )                                  | 27.5 $\pm$ 4.8                   | 25.9 $\pm$ 4.4                   | 0.244            |
| Diabetes mellitus                                         | 8                                | 2                                |                  |
| Hyperlipidaemia                                           | 15                               | 5                                |                  |
| Arterial hypertension                                     | 21                               | 6                                |                  |
| Blood pressure (mmHg) systolic                            | 129.1 $\pm$ 19.9                 | 120.8 $\pm$ 16.5                 | 0.154            |
| diastolic                                                 | 73.3 $\pm$ 12.2                  | 68.2 $\pm$ 15.1                  | 0.202            |
| Heart rate                                                | 79.7 $\pm$ 17.1                  | 77.9 $\pm$ 20.7                  | 0.747            |
| <b>Left atrial diameter (mm)</b>                          | <b>35.5 <math>\pm</math> 6.9</b> | <b>48.6 <math>\pm</math> 6.3</b> | <b>&lt;0.001</b> |
| <b>Patients with dilated left atrium (%)<sup>1</sup></b>  | <b>33</b>                        | <b>93</b>                        |                  |
| <b>Patients with dilated right atrium (%)<sup>2</sup></b> | <b>0</b>                         | <b>78</b>                        |                  |
| Ejection fraction (%)                                     | 47.3 $\pm$ 16.5                  | 45.3 $\pm$ 11.29                 | 0.664            |
| Surgical procedures                                       |                                  |                                  |                  |
| - Aorto-coronary venous bypass                            | 14                               | 7                                |                  |
| - Aortic valve replacement/reconstruction                 | 11                               | 8                                |                  |
| - Mitral valve replacement/reconstruction                 | 4                                | 6                                |                  |
| - Pulmonary valve repl./reconstruction                    | 0                                | 2                                |                  |
| - Tricuspid valve repl./reconstruction                    | 0                                | 6                                |                  |
| - Left ventricular assist device                          | 2                                | 0                                |                  |
| - Heart transplantation                                   | 1                                | 0                                |                  |
| - Aortic aneurism                                         | 5                                | 1                                |                  |
| - Aortic arch replacement                                 | 1                                | 1                                |                  |
| - Mechanical conduit                                      | 3                                | 0                                |                  |
| Number of patients receiving the following medication:    |                                  |                                  |                  |
| - ACE Inhibitors                                          | 13                               | 4                                |                  |
| - AT1-receptor blocker                                    | 6                                | 2                                |                  |
| - $\beta$ -Blocker                                        | 21                               | 11                               |                  |
| - Diuretics                                               | 11                               | 8                                |                  |
| - Aldosterone antagonists                                 | 1                                | 1                                |                  |
| - Nitrates                                                | 1                                | 0                                |                  |
| - Nitrates                                                | 16                               | 10                               |                  |
| - Statins                                                 | 13                               | 14                               |                  |
| - Anticoagulants                                          |                                  |                                  |                  |

144 ASA: American Society of Anaesthesiologists, BMI: body mass index, ACE: Angiotensin  
 145 converting enzyme, AT1: Angiotensin II receptor type I; mean  $\pm$  SD.<sup>1</sup> information available for  
 146 24 SR and 14 AF patients; <sup>2</sup> information available for 23 SR and 14 AF patients.

## 147 2.2 Cell culture

148 The size of the tissue samples was variable (50 to 200 mg). The epicardium and adipose  
149 tissue were carefully removed to avoid contamination with excess epicardial cells or  
150 adipocytes. The remaining myocardium was cut into blocks of about 1-4 mm<sup>3</sup>. Tissue chunks  
151 were transferred into a 6-well plate, each well containing 2 mL of Dulbecco's Modified Eagle  
152 Medium (DMEM, Gibco, Germany), 10% foetal calf serum, and 1% penicillin/streptomycin (all  
153 Sigma-Aldrich, Germany), for incubation at 37°C in an atmosphere of air supplemented with  
154 CO<sub>2</sub> to maintain 5% CO<sub>2</sub>. Culture medium was changed twice a week. Prior to use, the  
155 surface of culture plates had been abraded using a scalpel blade to favour tissue attachment  
156 and cell propagation. This so called "outgrowth technique"<sup>35</sup> was used for functional  
157 experiments as it yields more reproducibly large numbers of viable cells, compared to  
158 enzymatic digestion.

159 After 7-10 days, cells started to migrate from the tissue chunks and reached ~80%  
160 confluency after 20-28 days, when they had to be passaged to preserve viability. For  
161 passaging, culture medium was removed, and cells were washed with pre-warmed 1%  
162 phosphate-buffered saline (PBS) solution, detached by adding 1 mL of 1% trypsin per 35-mm  
163 dish for 5-10 min. After addition of 2 mL of culture medium per dish, the suspension was  
164 transferred into a 15 mL Falcon tube and centrifuged at 333 × g for 5 min. The supernatant  
165 was carefully removed and discarded. The cell pellet was resuspended in 1 mL of pre-  
166 warmed culture medium; 10 µL of this cell suspension were counted in a Neubauer chamber.  
167 Then cells were seeded into culture flasks or dishes for further experiments. To achieve a  
168 uniform cell density, 25,000 cells were seeded per 35-mm dish. Cells were used for  
169 experimentation until passage 4 (*i.e.* for up to 6 weeks). For co-immunoprecipitation  
170 experiments, the recently developed<sup>36</sup> human atrial fibroblast cell line HAF-SRK01 (HAF)  
171 was also used. Culture conditions for HAF and primary cultures were identical.

172 For reference purposes we also used atrial fibroblasts that were freshly isolated by  
173 enzymatic dissociation.<sup>35</sup> In brief, the right atrial tissue samples were placed into Ca<sup>2+</sup>-free  
174 modified 'Kraftbrühe' solution (in mmol/L, KCl 20, K<sub>2</sub>HPO<sub>4</sub> 10, glucose 25, D-mannitol 40, K-  
175 glutamate 70, β-hydroxybutyrate 10, taurine 20, EGTA 10, pH 7.2) supplemented with  
176 albumin (0.1%).<sup>37</sup> Fat and epicardial tissue were removed, and the remaining tissue was cut  
177 into pieces of 1-4 mm<sup>3</sup>, followed by rinsing for 5 min with Ca<sup>2+</sup>-free solution supplemented  
178 with taurine. The solutions were oxygenated with 100% O<sub>2</sub> at 37°C and stirred. For digestion,  
179 tissue aliquots were transferred for 10 min into a Ca<sup>2+</sup>-free solution (in mmol/L, NaCl 137,  
180 KH<sub>2</sub>PO<sub>4</sub> 5, MgSO<sub>4</sub>(7H<sub>2</sub>O) 1, glucose 10, HEPES 5, pH 7.4) supplemented with taurine,  
181 albumin (0.1%), collagenase type V (200 U/mL) and proteinase XXIV (5.4 U/mL). The Ca<sup>2+</sup>  
182 concentration was then increased to 0.2 mmol/L and the tissue was stirred for additional 20-  
183 30 min. An additional 10 min of incubation in the presence of collagenase was then  
184 performed to release the first cells. This step was repeated until complete digestion of the  
185 tissue was accomplished. Collected suspensions were centrifuged (7 × g for 2 min) to  
186 separate cardiomyocytes (in the pellet) from non-myocytes (in the supernatant).  
187 Cardiomyocytes were resuspended in 250 µL of lysis buffer (RLT, Qiagen, Germany) mixed  
188 with 10 µL of β-mercaptoethanol and frozen at -80°C. Non-myocytes were centrifuged at  
189 260 × g for 5 min. Cell pellets were resuspended in lysis buffer and frozen.

## 190 2.3 Immunocytochemistry

191 *Primary cell culture characterisation:* Cells were stained for vimentin (fibroblasts,  
192 myofibroblasts, endothelial cells; antibody from Progen, Germany), CD31 (endothelial cells;  
193 antibody from Pharmingen, USA), and α-smooth muscle actin (αSMA; myofibroblasts,  
194 smooth muscle cells; antibody from Abcam, USA). Cells were plated onto sterile glass cover-  
195 slips, cultured as described above, incubated, and fixed before they reached full confluency.  
196 Cell-containing coverslips were washed twice in PBS, incubated in acetone at -20°C for 5

197 min, and washed again with PBS. Blocking solution containing Polysorbat 20 (“Tween 20”) and foetal calf serum were used to reduce non-specific binding during incubation with primary, and subsequently secondary, antibodies. Nuclei were labelled using Hoechst 33342 nuclear counter stain. Images were acquired with a confocal or a wide-field fluorescence microscope. For quantifying  $\alpha$ SMA content, a threshold was used to define stained and unstained cells. We used the “Phansalkar” method in ImageJ to create a local threshold based on the minimum and maximum intensities of fluorescence in the proximity of every pixel.<sup>38</sup> Using this threshold, a macro was designed in ImageJ to identify green fluorescence and count all nuclei marked by Hoechst stain. *Piezo1 and BK<sub>Ca</sub> immunocytochemistry*: Cells were plated on fibronectin-coated glass coverslips (10 mm diameter), using 24-well plates seeded at 100,000 cells per well. Cells were fixed for 10 min using methanol (5%) and acetic acid at -20°C. Fixed cells were washed with PBS at room temperature (RT) and permeabilized with Triton 0.3% in PBS for 15 min, then incubated during 2 h at RT in the following blocking buffer: PBS containing BSA 4% goat serum 1%, and triton 0.03% for. Primary antibodies: anti-Piezo1 (proteintech, raised in rabbit, 1/300), anti-KCNMA1 (Abnova, Taipei, Taiwan, raised in mouse, 1/500), were incubated 1 hour RT in the blocking buffer. After several washes, secondary antibodies: anti-rabbit IgG AlexaFluor 647 (Invitrogen, Carlsbad, USA, raised in donkey, 1/1250) or anti-mouse IgG AlexaFluor 568 (Invitrogen, raised in donkey, 1/1250) were incubated 50 min at RT. Hoechst 33342 (Molecular Probes, Eugene, USA, 1/5000) were added before mounting with Polyvinyl alcohol mounting medium (with DABCO<sup>®</sup> antifade reagent, Fluka, Charlotte USA). Images were acquired with LSM 880M (Carl Zeiss, Oberkochen, Germany) with Zen software, maximal z resolution in these conditions was 0.618  $\mu$ m. Colocalisation was quantified using Pearson’s R coefficient calculated with ImageJ colocal2 plugin.

## 221 2.4 Electrophysiology

222 The patch-clamp technique was used to characterise ion channel activity in primary cultures  
223 of atrial fibroblasts. Experiments were performed at room temperature (20°C), using a patch-  
224 clamp amplifier (200B, Axon Instruments, USA) and a Digidata 1440A interface (Axon  
225 Instruments). Recorded currents were digitized at 3 kHz, low-pass filtered at 1 kHz, and  
226 analysed with pCLAMP10.3 software (Axon Instruments) and ORIGIN9.1 (OriginLab, USA).  
227 Cell-attached patch-clamp recordings were performed using bath and pipette solutions  
228 previously described for characterizing Piezo1 channels.<sup>39</sup> In short: pipette medium  
229 contained (in mmol/L): NaCl 150, KCl 5, CaCl<sub>2</sub> 2, HEPES 10 (pH 7.4 with NaOH); bath  
230 medium contained (in mmol/L): KCl 155, EGTA 5, MgCl<sub>2</sub> 3, and HEPES 10 (pH 7.2 with  
231 KOH). Average pipette resistance was 1.3 M $\Omega$ . Culture medium was removed and  
232 exchanged for the bath solution at least 5 min before the start of electrophysiological  
233 measurements to wash-out culture medium and streptomycin (a blocker of SAC).<sup>40</sup>  
234 Membrane patches were stimulated with brief (500 ms) negative pressure pulses of  
235 increasing amplitude (from 0 up to -80 mmHg, in 10 mmHg increments unless otherwise  
236 stated), applied through the recording electrode using a pressure-clamp device (ALA High  
237 Speed Pressure Clamp-1 system; ALA Scientific, USA). To confirm channel identity, we  
238 applied the spider toxin peptide *Grammostola spatulata* mechanotoxin 4 (GsMTx4) L-isomer  
239 (10  $\mu$ mol/L, H<sub>2</sub>O as solvent, CSBio, Menlo Park, CA, USA), a known blocker of cation non-  
240 selective SAC, including Piezo1<sup>41</sup> and potassium-selective ion channels such as BK<sub>Ca</sub>.<sup>42</sup> The  
241 holding voltage for all experiments was -80 mV when recording Piezo1. Current-pressure  
242 curves were fitted with a standard Boltzmann function ( $I = (I_{max} - I_{min}) / (1 + e^{(P - P_{0.5})/k}) + I_{min}$ ), where  
243  $I_{max}$  is the highest value of current during a pressure pulse,  $I_{min}$  is the lowest one, and  $P_{0.5}$  is  
244 the pressure required to obtain half-maximal activation and k is the time constant.  
245 BK<sub>Ca</sub> channel activity in the absence of additional mechanical perturbation was recorded by  
246 depolarising the membrane (from -10 mV up to +60 mV, in 10 mV increments), holding each  
247 potential for 22 s. In some cases, the membrane was depolarised up to +80 mV for

248 illustration purposes. The fraction of time during which a channel was open was measured  
249 to define the open probability of the channel. To confirm channel identity, the BK<sub>Ca</sub> activator  
250 NS11021 (10 μmol/L or 5 μmol/L, courtesy of Bo Bentzen, Denmark) as well as the BK<sub>Ca</sub>  
251 blockers paxilline (3 μmol/L with 0.03% DMSO, Sigma-Aldrich, Darmstadt, Germany) and  
252 iberiotoxin (100 nmol/L, Tocris, Bristol, UK) were used. To assess stretch responses of BK<sub>Ca</sub>,  
253 membrane patches were held at +50 mV and stimulated with long (10 s) negative pressure  
254 pulses of increasing amplitude (10 mmHg increments). To assess the possible relevance of  
255 extracellular calcium on BK<sub>Ca</sub> activation during stretch, a calcium-free pipette solution was  
256 used. It contained (in mmol/L): NaCl 150, KCl 5, EGTA 6, HEPES 10 (pH 7.4 with NaOH). To  
257 further confirm channel identity, the dependence of BK<sub>Ca</sub> channel activity on intracellular Ca<sup>2+</sup>  
258 concentration was measured in the inside-out patch-clamp configuration. Patch excision was  
259 achieved by a fast upward displacement of the patch pipette. The bath medium (a nominally  
260 Ca<sup>2+</sup>-free solution in these experiments) was supplemented with CaCl<sub>2</sub> to obtain Ca<sup>2+</sup>  
261 concentrations of 1, 10 and 10 μmol/L.  
262 In order to probe possible interactions between Piezo1 and BK<sub>Ca</sub> activity, a protocol was used  
263 that first activated Piezo1 with a negative pressure pulse (-50 mmHg for 1 s) while holding  
264 the patch at -80 mV, and subsequently BK<sub>Ca</sub> by releasing pressure back to 0 mmHg while  
265 clamping the patch to +50 mV (see Fig. 5A for illustration).  
266 Gigaohm seal resistance was systematically checked before and after each protocol: seals  
267 having a resistance below 1 GΩ were rejected. If following a stretch protocol, the current did  
268 not return to baseline within 20 s, the recording was rejected.

## 269 2.5 Molecular biology

270 All reagents, kits and instruments used for molecular biology analysis were supplied by  
271 Thermo Fisher Scientific, Germany.  
272 *mRNA expression levels*: Isolation of total RNA was performed using TRIzol Reagent, and  
273 frozen samples (made from freshly isolated cells, or from cultured cells for knockdown  
274 experiments) were processed according to the manufacturer's protocol. RNA concentration  
275 was quantified by spectrophotometry (ND-1000, Thermo Fisher Scientific, Germany) and  
276 synthesis of single-stranded cDNA was carried out as reported before<sup>43</sup> with the Maxima First  
277 Strand cDNA Synthesis Kit, using 3 μg of total RNA. Quantitative real-time polymerase chain  
278 reactions (RT-qPCR) was performed as described earlier.<sup>43</sup> Briefly, 10 μL were used per  
279 reaction, consisting of 0.5 μL cDNA, 5 μL TaqMan Fast Universal Master Mix and 6-  
280 carboxyfluorescein (FAM)-labelled TaqMan probes and primers. Primers were analysed  
281 using the StepOnePlus (Applied Biosystems, Foster City, CA, USA) PCR system. The  
282 importin-8 housekeeping gene (IPO8), or glyceraldehyde 3-phosphate dehydrogenase  
283 (GAPDH), was used for normalisation. All RT-qPCR reactions were performed as triplicates  
284 and control experiments in the absence of cDNA were included. Means of triplicates were  
285 used for the 2-ΔCt calculation, where 2-ΔCt corresponds to the ratio of mRNA expression  
286 versus IPO8. Oligonucleotide sequences are available on request.  
287 *PCR-based detection of the Stress-Axis Regulated Exon (STREX)*: Total RNA was isolated  
288 from freshly isolated fibroblasts and reverse transcribed into cDNA as described earlier.  
289 Primers were designed to flank the putative STREX sequence (forward: 5' –  
290 CTGTCATGATGACATCACAGATC – 3'; reverse: 5' – GTCAATCTGATCATTGCCAGG – 3',  
291 Fig. 4E). PCR were performed to amplify the respective sequence from cDNA of isolated  
292 cells from 4 patients. PCR amplification was performed for 40 cycles, using the TaqMan Fast  
293 Advanced Master Mix (Cat. No. 4444557, ThermoFisher) according to the manufacturer's  
294 instructions. Subsequently, PCR products were separated by agarose gel electrophoresis  
295 and ethidium bromide was visualized by an E-BOX VX2 2.0 MP (Peqlab, Erlangen,  
296 Germany) documentation system.

297 *Silencing of Piezo1*: small interference RNA (siRNA)-mediated knockdown was achieved by  
298 transfection using HiPerFect (Qiagen, Venlo, The Netherlands), used according to the  
299 manufacturer's instructions. Pools of 4 siRNA were applied at a final concentration of  
300 8 nmol/L for Piezo1 and Piezo2 (SMARTpool, Dharmacon, Lafayette, USA); concentrations  
301 of scrambled controls (Dharmacon) were adjusted accordingly. Knockdown efficiency was  
302 assessed by RT-qPCR 48 h after transfection, and electrophysiological experiments were  
303 performed 72 h after transfection. The empty vector (siNT) and Piezo1 EGFP constructs  
304 (siPiezo1) were transfected in primary human atrial fibroblasts using jetPEI (Polyplus  
305 transfection, Illkirch, France) at 0.5 µg of plasmid DNA per 35-mm dish containing ≈25,000  
306 cells.

## 307 **2.6 Co-immunoprecipitation**

308 Cells were grown to confluence in 60 mm dishes, washed twice with ice-cold PBS, lysed with  
309 immuno-precipitation (IP)-lysis buffer (from IP Lysis kit Pierce) and supplemented with anti-  
310 protease (Roche, Basel, Switzerland). Co-immuno-precipitation (Co-IP) were done following  
311 the manufacturer protocol (Pierce co-IP kit). For antibody immobilisation, 10 µg of mouse  
312 monoclonal anti-Piezo1 (MyBioSource, San Diego, USA), mouse anti-KCNMA1 (Abnova),  
313 mouse monoclonal anti-Na<sup>+</sup>/K<sup>+</sup>-ATPase β1 subunit (Sigma) were added to 50 µL of  
314 AminoLink Plus Coupling Resin (Creative Biolabs, New York, USA). Control was done with  
315 anti-mouse IgG (Sigma).

316 Co-immunoprecipitation eluates were subjected to 8% sodium dodecyl sulphate–  
317 polyacrylamide gel electrophoresis (SDS-PAGE) before transfer onto a Polyvinylidene  
318 fluoride membrane. Membrane was saturated with 5% low-fat milk in Tris-buffered saline  
319 containing tween 0.1% during 1 hour at RT and then probed with primary antibodies: anti-  
320 Piezo1 (rabbit, Proteintech, 1/1000), anti-KCNMA1 (rabbit, Bethyl, 1/1000), anti-Na<sup>+</sup>/K<sup>+</sup>-  
321 ATPase β1 subunit (Sigma, 1/1000), over-night at 4°C. Horseradish Peroxidase conjugated  
322 anti-mouse IgG (Dako, 1/5000) and anti-rabbit IgG (Dako, 1/2000) were used as secondary  
323 antibodies. Blots were revealed with Enhanced Chemoluminescence (Millipore) reaction on a  
324 Fusion FX7 Edge 2019. Quantification was made with ImageJ software on 8-bit images after  
325 background subtraction (50 pixels rolling ball radius).

## 326 **2.7 Statistical analysis**

327 Unless otherwise indicated, values are expressed as mean ± SEM. *N*-numbers refer to the  
328 number of tissue donors, *n*-numbers to the number of cells assessed. Differences between  
329 groups with *n* ≥ 21 were evaluated by Student's *t*-test. For conditions with *n* < 21,  
330 significance of the difference between means was tested with the nonparametric Mann-  
331 Whitney test. The Pearson's correlation coefficient was used to compare Piezo1 and BK<sub>Ca</sub>  
332 localisation. A *p*-value < 0.05 was taken to indicate a significant difference between means.  
333 Designation of significance: \* *p* < 0.05; \*\* *p* < 0.01; \*\*\* *p* < 0.001; ns = not significant.  
334

# 335 **3. Results**

## 336 **3.1 Fibroblasts and myofibroblasts are the main constituents of right atrial** 337 **outgrowth cell cultures**

338 Cells obtained by the outgrowth technique from human right atrial appendage did not contain  
339 any cardiomyocytes. The majority (98%) of cells stained positive for vimentin, and 1% of the  
340 cells were positive for the endothelial cell marker CD31. Antibody functionality was verified in  
341 positive controls using human umbilical vein endothelial cell (HUVEC; Fig. S1A-B). Overall,  
342 results confirmed that the outgrowth technique yields predominantly fibroblasts-like cells with  
343 negligible contamination by endothelial cells. Vimentin-positive cells formed a mixed  
344 population of myofibroblasts and fibroblasts. Myofibroblasts constituted an average of 17.9 ±

345 9.4% of all cells analysed (n > 37,000 cells / N = 11 SR patients), based on  $\alpha$ SMA staining  
346 (Fig. S1C).

### 347 3.2 Piezo1 in right atrial fibroblasts of patients in SR

348 In cell-attached patch clamp recordings (holding potential  $-80$  mV), SAC were observed in  
349 response to negative pressure pulses in the patch pipette (Fig. 1A). In this particular cell,  
350 inward current activated rather slowly at  $-40$  mmHg, whereas at  $-80$  mmHg, the current  
351 peaked rapidly and partially inactivated. Activation and inactivation patterns were variable,  
352 therefore, in addition to peak-current amplitude, the average current (mean current  
353 calculated over the duration of the pulse of pressure) was analysed. Current-pressure curves  
354 had a sigmoidal shape, suggesting saturation at patch pipette pressures more negative than  
355  $-60$  mmHg (Fig. 1B). In n = 110 cells from N = 11 patients in SR, the peak-current amplitude  
356 was  $-37.4 \pm 2.8$  pA at  $-60$  mmHg and the average current amplitude was  $-19.9 \pm 1.7$  pA.  
357 The current-voltage (I-V) relationship obtained from single channel activity (n = 9 cells from  
358 N = 3 SR patients) was linear, with a slope that yielded a channel conductance of  $34.2 \pm$   
359  $1.6$  pS (activity recorded at  $-30$  mmHg pipette pressure or during deactivation, Fig. 1C). The  
360 reversal potential near  $0$  mV suggests the presence of a cation-nonselective SAC in human  
361 atrial fibroblasts. This was further tested by employing the blocker GsMTx4, which inhibited  
362 SAC activity: the average current at  $-60$  mmHg was  $-42.5 \pm 8.3$  pA (n = 21; N = 3) in control  
363 conditions, *versus*  $-10.4 \pm 2.0$  pA (n = 24; N = 3) in the presence of GsMTx4 (Fig. 1D).



364

365

366 **Figure 1: Cation non-selective SAC activity, compatible with Piezo1, is present in human**  
367 **right atrial fibroblasts from patients in sinus rhythm (SR), including cells from passages 0 to 4.**  
368 **A:** SAC activity, elicited by pulses of negative pressure in cell-attached mode. **B:** Average and peak-  
369 currents for all negative pipette pressures tested (from 0 to -80 mmHg); numbers in brackets state *n*  
370 of cells (here 110) and *N* of tissue donors (here 11) throughout all illustrations. **C:** Top: Single SAC  
371 channel activity, activated by a -30 mmHg pressure pulse. Bottom: I-V curve for single channel  
372 currents recorded at -30 mmHg or during deactivation, the slope of the straight line was calculated by  
373 linear regression (conductance  $g = 34.2 \pm 1.6$  pS). **D:** SAC activity at -60 mmHg under control  
374 conditions and with GsMTx4 L-isomer (10  $\mu$ mol/L) in the pipette solution (same patients used for the  
375 two conditions). **E:** Representative traces of SAC activity with siRNA targeting Piezo1 (siPiezo1; black  
376 trace) and in presence of a non-targeting siRNA (siNT; blue trace), and. **F:** Summary of pressure-  
377 effects on average SAC current in cells transfected either with siNT or with a pool of 4 siRNA directed  
378 against Piezo1. All recordings, except for I-V curve, were obtained at -80 mV. For all figures: asterisks  
379 indicate statistical significance, statistical analysis is described in the section 2.7.

380 In order to test which SAC contributes to the observed current, Piezo1 was knocked down  
381 using a pool of siRNA. Under these conditions, stretch-induced current activity was strongly  
382 reduced at all pressure levels tested (Fig. 1E-F); at -60 mmHg, the average current was  
383  $-15.8 \pm 1.6$  pA ( $n = 51$ ;  $N = 3$ ) in control cells transfected with non-targeting siRNA (Fig.  
384 S2A), versus  $-2.3 \pm 0.4$  pA in siPiezo1 transfected cells ( $n = 49$ ;  $N = 3$ ). These values  
385 correspond well with the observed 90% reduction in mRNA expression of Piezo1 (but not  
386 Piezo2) in siPiezo1-treated cells (Fig. S2B).

387 Altogether, these results indicate that the SAC activity recorded at -80 mV in human atrial  
388 fibroblasts is carried largely by Piezo1.

### 389 3.3 BK<sub>Ca</sub> activity in right atrial fibroblasts of patients in SR

390 In cell-attached voltage clamp experiments without additional suction applied to the  
391 membrane, we recorded a distinct ion channel activity at voltages positive to +10 mV. The  
392 open probability of this outward current was strongly enhanced by increasing membrane  
393 depolarisation (Fig. 2A-B). In addition to this pronounced voltage dependency, the  
394 conductance of channels was large, at  $125.1 \pm 4.9$  pS ( $n = 60$ ;  $N = 8$ ; Fig. 2C). Based on  
395 these biophysical properties, we identified BK<sub>Ca</sub> as a possible candidate underlying the  
396 current.

397 As means of further validation, we used a pharmacological approach utilising drugs known to  
398 either inhibit<sup>44-46</sup> or activate<sup>47</sup> BK<sub>Ca</sub>. Paxilline and iberiotoxin strongly reduced the observed  
399 activity (Fig. 2D), while NS11021 caused a robust increase in open probability. The increase  
400 in open probability was attributable to an increase in the number of events and dwell time  
401 (see Fig S3A and B). There was no significant difference in the conductance of the channel  
402 in the presence or absence of NS11021 (Fig. S3C). Interestingly, NS11021 caused a shift in  
403 potential dependence of dwell time to less positive potential; this shift was even larger than  
404 that in open probability (Fig. S3B).

405 A key feature of BK<sub>Ca</sub> channels is their Ca<sup>2+</sup> sensitivity. We therefore tested the effects of  
406 various internal Ca<sup>2+</sup> concentrations on channel activity (Fig. 2E and F). The inside-out patch  
407 configuration was used to expose the cytosolic side of the plasma membrane to increasing  
408 Ca<sup>2+</sup> concentrations, ranging from a nominally Ca<sup>2+</sup>-free environment to 100  $\mu$ mol/L (pipette  
409 was Ca<sup>2+</sup>-free). Upon increase of the Ca<sup>2+</sup> concentration, a robust activation of the current  
410 was observed (from  $5.6 \pm 1.5$  to  $90.9 \pm 26.0$  pA;  $n = 11$ ,  $N = 2$ ).

411 Taken together, our results indicate the presence of BK<sub>Ca</sub> channel activity in atrial fibroblasts  
412 from patients in SR.

413



414

415 **Figure 2: Characterization of  $BK_{Ca}$  currents in right atrial fibroblasts from patients in SR.** **A:**  
 416 Current traces in cell-attached patch clamp mode at different holding potentials in the absence of  
 417 additional mechanical stimulation. Inset: expanded time scale for the trace at +80 mV. **B:** Open  
 418 probability of  $BK_{Ca}$  channels at different potentials from -10 to +60 mV. **C:** I-V curve for single channel  
 419 currents; straight line slope was calculated by linear regression (conductance  $g = 125.1 \pm 4.9$  pS). **D:**  
 420 Open probability of single channels in control conditions and with 3  $\mu$ M paxilline ( $n = 26$ ,  $N = 2$  and  
 421  $n = 21$ ,  $N = 2$  respectively [same SR patients]); in control conditions and with iberiotoxin (IbTx)  
 422 100 nmol/L ( $n = 12$ ,  $N = 2$  and  $n = 15$ ,  $N = 2$  respectively [same SR patients]); and in control conditions  
 423 with the  $BK_{Ca}$  channel activator NS11021 at 5 and 10  $\mu$ M/L ( $n = 14$ ,  $N = 2$ ;  $n = 11$ ,  $N = 1$ ;  $n = 18$ ,  
 424  $N = 2$ , respectively [same SR patients]). Of note, the two controls used for paxilline and iberiotoxin  
 425 (different patients) illustrate inter-patient variability. **E:** Original recording of  $BK_{Ca}$  channel activity at  
 426 +60 mV in the inside-out configuration with increasing concentrations of  $Ca^{2+}$  applied to the cytosolic  
 427 side of the membrane. **F:** Corresponding quantification of  $BK_{Ca}$  channel activity.

428

### 429 3.4 Piezo1 and $BK_{Ca}$ activity in right atrial fibroblasts of patients in AF

430 Piezo1 activity was detected in all AF and SR patients studied. The percentage of cells in  
 431 which Piezo1 activity was detected was comparable in both patient populations (87%,  $n = 52$ ,  
 432  $N = 5$  in AF; 85%,  $n = 112$ ,  $N = 10$  in SR). Average Piezo1 current from cells at passage 0  
 433 (matched for cell culture time) was significantly higher in right atrial fibroblasts from patients  
 434 in AF, compared to SR, at negative pressures of -40 mmHg or more (Fig. 3A-B).

435  $BK_{Ca}$  activity was also observed in all patients. In some cells, we did not detect  $BK_{Ca}$  channel  
 436 activity under our conditions, and no other channel activity could be measured in these

437 'silent' patches. The fraction of silent patches was larger in cells from AF than SR patients  
438 (60% *versus* 34%; n = 80, N = 5 for AF; n = 106, N = 10 for SR). In contrast to Piezo1, BK<sub>Ca</sub>  
439 channels activity was significantly lower in fibroblast from AF than SR patients for voltage  
440 clamp steps of +40 mV or more (Fig. 3C-D) even after excluding silent patches (not shown).  
441 The reduced open probability was due to a lower number of events in cells from AF tissue;  
442 mean dwell times were not significantly different in AF and SR (Fig. S4A-B).

443 The slopes of the I-V curves, both for Piezo1 or BK<sub>Ca</sub> channels, were not different in cells  
444 from AF and SR patients (Fig. S4C-D). The distribution of cells exhibiting the various  
445 activation-inactivation patterns of Piezo1 currents was also not significantly different in cells  
446 from AF compared to cells from SR patients (Fig. S4E). These results suggest that the  
447 observed differences in Piezo1 and BK<sub>Ca</sub> activities of fibroblasts from AF tissue, compared to  
448 SR, are likely to be due to altered channel presence, rather than changes in channel  
449 properties.

450 To test the hypothesis that AF is associated with alterations in the expression of Piezo1 and  
451 BK<sub>Ca</sub>, we measured the levels of mRNA encoding *PIEZO1* and *KCNMA1*<sup>48, 49</sup> using RT-qPCR  
452 in human right atrial non-myocytes. Freshly isolated non-myocytes, obtained by enzymatic  
453 dissociation, were used to capture gene expression levels without any culture time, to be as  
454 close as possible to tissue conditions (Fig. 3E). Piezo1 expression levels in non-myocytes  
455 from AF patients were almost twice the level of SR cells. For BK<sub>Ca</sub> channel expression, we  
456 did not observe significant differences between the AF and SR groups (Fig. 3E). For control  
457 purposes, the purity of the non-myocyte fraction, obtained with our enzymatic dissociation  
458 method, was checked by quantifying the expression of typical markers for non-myocytes and  
459 cardiomyocytes, *i.e.* vimentin and troponin, respectively (Fig. S5). Expression of vimentin  
460 was higher in batch containing isolated non-myocytes than in cardiomyocytes, whereas  
461 expression of troponin was higher in isolated myocytes, suggesting that the isolation protocol  
462 yielded a significant enrichment of the desired cell type.

463 Piezo1 activity was found to remodel over culture time (Fig. 3F and S6). Piezo1 activity in  
464 cells from SR patients at passage 1 was significantly higher than in passage 0. No further  
465 increase of Piezo1 activity was detected at passage 2 (not shown). Cells from AF patients  
466 start off with a significantly higher level of Piezo1 than SR cells at passage 0. There is no  
467 further significant change in Piezo1 activity in cells from AF tissue (when comparing passage  
468 1 to passage 0), and the initial difference between cells from SR and AF patients is lost at  
469 passage 1.

470 These results indicate that the two channels are differentially regulated in AF, with an  
471 increase in Piezo1 activity and expression, and a down-regulation of BK<sub>Ca</sub> activity.



472

473 **Figure 3: Comparison of Piezo1 and BK<sub>Ca</sub> channel activity and mRNA expression levels in atrial**  
 474 **fibroblasts from patients in SR (blue) and AF (red).** **A:** Representative current traces (holding  
 475 **potential -80 mV) activated by 500-ms negative pressure pulse (-80 mmHg).** **B:** Mean current-  
 476 **pressure curve for Piezo1, cells from passage 0 only.** **C:** Representative traces of single BK<sub>Ca</sub>  
 477 **channel activity in fibroblasts from an SR and AF patient at different holding potentials.** **D:** Voltage  
 478 **dependence of open probability of BK<sub>Ca</sub> channels from all patches studied.** **E:** mRNA expression  
 479 **levels of Piezo1 and KCNNA1, normalised to the housekeeping gene (HK), in freshly isolated non-myocytes**  
 480 **from patients in SR and patients in AF.** **F:** Current-pressure relationship (average current; holding  
 481 **potential -80 mV) of cells from SR and AF patients at passage 0 (dotted lines; re-plotted for comparison**  
 482 **from panel B) and passage 1 (solid lines).**

### 483 3.5 BK<sub>Ca</sub> activation during stretch: evidence for two mechanisms

484 BK<sub>Ca</sub> channels have been described as mechano-sensitive,<sup>50</sup> activated directly by membrane

485 stretch.<sup>51</sup> This has been contrasted by the suggestion that they may also respond to

486 mechanical stimuli indirectly, by sensing changes in intracellular Ca<sup>2+</sup>-concentration, caused

487 by stretch-induced Ca<sup>2+</sup> and/or Na<sup>+</sup> entry through other SAC.<sup>52</sup> Therefore we tested whether

488 BK<sub>Ca</sub> channel activity in human atrial fibroblasts was modified by stretch.

489 Fibroblasts from patients in SR were voltage-clamped to +50 mV in cell-attached mode and

490 the patched membrane was simultaneously subjected to negative pressure pulses. The

491 current traces in Fig. 4A show an increase of the typical large-conductance BK<sub>Ca</sub> channel

492 activity at negative pressures, compatible with stretch-dependent activation. In this particular

493 patch, the maximum number of simultaneously open channels was 3.

494



495

496 **Figure 4: BK<sub>Ca</sub> stretch-response in human atrial fibroblasts from patients in SR.** **A:**  
 497 Representative current traces at +50 mV in a cell-attached patch from a fibroblast subjected to  
 498 negative pressure pulses (cell from a donor in SR). **B:** BK<sub>Ca</sub> open probability in response to stretch  
 499 with (2 mmol/L) and without Ca<sup>2+</sup> in the pipette solution. Asterisks indicate statistical significance  
 500 versus control (with calcium), "+" indicate statistical significance versus no pressure. **C:**  
 501 Representative recording showing single channel events with (-50 mmHg) and without pressure in a  
 502 nominally Ca<sup>2+</sup>-free environment pipette solution at +50 mV. **D:** Quantification of the channel open  
 503 probability, number of single channel events (N. events), dwell time (ms) and single channel amplitude  
 504 (pA) under conditions described in C. **E:** Schematic representing the position of the two PCR primers  
 505 used to detect presence or absence of STREX in whole cell mRNA from freshly isolated non-  
 506 myocytes. bp: base pairs **F:** PCR results showing presence of BK<sub>Ca</sub> mRNA with and without STREX in  
 507 4 patients. NTC: no template control. A purified BK<sub>Ca</sub> plasmid without STREX is used as a positive  
 508 control. **G:** Representative recording illustrating the effect of patch excision (from cell-attached to the  
 509 inside-out configuration) on single channel activity at +60 mV and without pressure; standard Ca<sup>2+</sup>  
 510 conditions: nominally Ca<sup>2+</sup>-free bath solution and 2 mmol/L Ca<sup>2+</sup> in the pipette solution. **H:**  
 511 Quantification of the channel open probability in the conditions described in G.

512

513 The mean open probability of BK<sub>Ca</sub> channels in the presence of 2 mmol/L Ca<sup>2+</sup> in the pipette  
 514 solution was significantly enhanced by increasing negative pressure (shown for n = 18 cells  
 515 from N = 3 SR patients in Fig. 4B). Interestingly, without Ca<sup>2+</sup> in the pipette solution, the  
 516 stretch-dependent increase in BK<sub>Ca</sub> channel open probability was significantly lower (n = 18  
 517 cells from the same N = 3 patients) but not abolished (Fig. B). The stretch-induced increase  
 518 in open probability resulted mainly from a higher number of single channel events and

519 increased dwell time, while single channel current amplitudes were not significantly  
520 different (Fig. 4C and D). As the stress-axis regulated exon (STREX) was described as  
521 instrumental for BK<sub>Ca</sub> stretch-activation, its presence was assessed in freshly isolated human  
522 atrial fibroblasts (Fig. 4E and F). PCR results demonstrate that STREX is present in most  
523 patients tested, although the BK<sub>Ca</sub> splice variant without STREX is more abundantly  
524 expressed. Upon patch excision, the open probability increased (Fig. 4G and H), suggesting  
525 an inhibition of channel activity by the cytoskeleton, as previously shown for BK<sub>Ca</sub>.<sup>53</sup> The data  
526 in Fig. 4B suggest that the majority of BK<sub>Ca</sub>-activity during mechanical stimulation is  
527 dependent on external Ca<sup>2+</sup>. We hypothesised that Ca<sup>2+</sup> entry may be secondary to  
528 activation of other SAC. We therefore assessed Piezo1 and BK<sub>Ca</sub> channel crosstalk (Fig. 5).  
529 After activating Piezo1 with a 1-s long pulse of negative pressure at a holding potential of  
530 -80 mV, suction was terminated and the holding potential switched to +50 mV. This yielded a  
531 large outward current that decayed slowly and, once the current amplitude had declined  
532 sufficiently, single channel activity could be resolved, compatible with BK<sub>Ca</sub> activity (see inset  
533 in Fig. 5A). Piezo1 activity is known to rundown in response to repeat stimulation,<sup>54</sup> so when  
534 the protocol was repeated, average inward current amplitudes declined dramatically as  
535 expected (Fig. 5A-B). Interestingly, the outward current observed upon depolarisation  
536 declined in a similar manner. With 0 mmol/L Ca<sup>2+</sup> in the pipette solution, Piezo1 activity was  
537 comparable to control conditions (with calcium), but hardly any BK<sub>Ca</sub> activity was observed  
538 (Fig. 5C-D). In some rare patches in which no SAC current was observed at -50 mmHg, the  
539 protocol also failed to yield BK<sub>Ca</sub> activity (Fig. 5E, BK<sub>Ca</sub> channel presence was confirmed by  
540 activating them, using membrane depolarisation [not shown]). Following the same line of  
541 thought, after down-regulation of Piezo1 by siRNA, stretch-dependent BK<sub>Ca</sub> channel open  
542 probability was reduced (Fig. 5F).  
543 Overall, these results suggest that in human right atrial fibroblasts the apparent mechano-  
544 sensitivity of BK<sub>Ca</sub> channels is mainly secondary to cation non-selective SAC activity,  
545 involving Piezo1. The same mechanism was also observed in fibroblasts obtained from AF  
546 patients (Fig. S7).  
547



548  
 549 **Figure 5: Functional coupling between BK<sub>Ca</sub> channels and Piezo1 in SR patients.** **A:** Piezo1 and  
 550 BK<sub>Ca</sub> currents, activated during 3 consecutive sweeps (at 1-min intervals) with the indicated voltage  
 551 clamp / pressure pulse protocol. The initial suction-induced inward current is carried by Piezo (shades  
 552 of grey), while the subsequent outward current mainly represents BK<sub>Ca</sub> (shades of blue). **B:** Mean  
 553 values of average Piezo1 and BK<sub>Ca</sub> currents during 5 consecutive runs of the voltage clamp / pressure  
 554 pulse protocol. **C:** Absence of Ca<sup>2+</sup> in the pipette solution drastically reduces activation of BK<sub>Ca</sub>  
 555 currents during the same voltage clamp / pressure pulse protocol as in A). **D:** Average Piezo1 and  
 556 BK<sub>Ca</sub> currents in the presence of 2 mmol/L Ca<sup>2+</sup> (left) and in a nominally Ca<sup>2+</sup>-free pipette solution (first  
 557 sweep of the protocol shown in C is quantified). **E:** Lack of BK<sub>Ca</sub> activation in the rare patches without  
 558 Piezo1 activity. **F:** Open probability of BK<sub>Ca</sub> channels (same protocol as in A) in fibroblasts transfected  
 559 with siRNA targeted against Piezo1 or the empty vector (siNT) or (same patients in SR). Inset:  
 560 amplitude of average SAC currents, induced by -80 mmHg in the same batch of cells (holding  
 561 potential -80 mV).

### 562 3.6 Assessment of Piezo1 - BK<sub>Ca</sub> structural coupling

563 To investigate whether the functional interactions of Piezo1 and BK<sub>Ca</sub> require a physical  
 564 connection of the two channel proteins, co-immunoprecipitation experiments were  
 565 performed.

566 Using either Piezo1 to immunoprecipitate BK<sub>Ca</sub> or BK<sub>Ca</sub> to immunoprecipitate Piezo1, no  
 567 interactions were detected in fibroblast primary cultures (Fig. 6A). Because the quantity of  
 568 material is limited when working with primary cultures and to improve Piezo1 signal  
 569 (presence of smear possibly due to post-translational modifications) additional experiments  
 570 were performed in a human atrial fibroblast cell line.<sup>36</sup> In these conditions, no interactions

571 between the two channels were observed (Fig. 6B) while the Na<sup>+</sup>/K<sup>+</sup>-ATPase, a known  
572 binding-partner of BK<sub>Ca</sub>,<sup>55</sup> co-immunoprecipitated with BK<sub>Ca</sub> (Fig. 6C).  
573 In agreement with these findings, immunocytochemistry experiments, performed on primary  
574 cultures of right atrial fibroblasts from SR patients, revealed distinct localisation profiles of  
575 Piezo1 and BK<sub>Ca</sub> with limited overlap (Fig. 6D). The Pearson's correlation coefficient of the  
576 two signals is 0.46 ± 0.03 (n = 22, N = 1), which indicates no significant degree of correlation.  
577 These results suggest that, although Piezo1 and BK<sub>Ca</sub> are frequently present in the same  
578 membrane patches in electrophysiological experiments, they are not physically linked.  
579



580  
581 **Figure 6: Piezo1 and BK<sub>Ca</sub> channels do not co-immunoprecipitate and have distinct localisation**  
582 **profiles.** **A:** Representative Western blots, showing co-immunoprecipitations with anti-Piezo1 or anti-  
583 BK of human atrial fibroblast lysates. **B:** Same experiment performed using a human atrial fibroblast  
584 cell line. A column with mouse nonspecific IgG was used as negative control. **C:** Co-  
585 immunoprecipitation of Na<sup>+</sup>/K<sup>+</sup>-ATPase and BK<sub>Ca</sub> in the human atrial fibroblast cell line (positive  
586 control). **D:** Immuno-staining showing Piezo1 and BK<sub>Ca</sub> in a primary human right atrial fibroblast.

587

588

#### 4. Discussion

589 We confirm the presence, in human right atrial fibroblasts from patients in SR and AF, of at  
590 least two different types of ion currents that are activated during stretch: the cation-  
591 nonselective Piezo1 and the potassium-selective BK<sub>Ca</sub>. Our main findings are: (i) activity and  
592 expression of Piezo1 are larger in right atrial fibroblasts from AF patients than in cells from  
593 SR patients; (ii) activity, but not expression, of BK<sub>Ca</sub> channels is lower in AF than in SR; and  
594 (iii) mechano-sensitivity of BK<sub>Ca</sub> channels in human atrial fibroblasts is largely secondary to  
595 stretch-induced activation of other SAC, including Piezo1.

#### 596 4.1 Cell Identities

597 As reported in the literature, various cells migrate from small chunks of atrial tissue when  
598 placed into appropriate culture medium.<sup>35</sup> In our hands, this 'outgrowth technique' yields 98%  
599 vimentin positive cells. In previous work with the same model, we used human fibroblast  
600 surface protein as an additional marker to confirm that the vimentin-positive cells are largely  
601 fibroblasts.<sup>35</sup> The endothelial cell marker CD31 was detected in only 1% of our cells,  
602 indicating that the majority of the population is of non-endothelial origin. Upon activation,  
603 fibroblasts differentiate into myofibroblasts that express  $\alpha$ SMA.<sup>56</sup> The percentage of cells that  
604 stained positively for  $\alpha$ SMA varied between individuals, with an average of 18% in passage 0  
605 (values ranged from 4% to 38%). In live cell experiments, *i.e.* in the absence of antibody  
606 staining, fibroblasts and myofibroblasts could not be differentiated with certainty, based on  
607 morphological criteria including size, capacitance and shape. Functional results will therefore  
608 reflect a mix of cells, of which  $\geq 80\%$  were fibroblasts.

#### 609 4.2 SAC in human atrial fibroblasts involve Piezo1 channels

610 In human atrial fibroblasts, voltage-dependent ion channels have been reported,<sup>31, 32, 35</sup>  
611 though relatively little is known about SAC. Negative pressure pulses, applied to the patch  
612 pipette at a holding potential of  $-80$  mV, activate inward currents with variable inactivation  
613 kinetics. These currents deactivate completely upon pressure release. Using GsMTx4 and a  
614 knockdown approach targeting Piezo1, we demonstrate that these SAC in human right atrial  
615 fibroblasts are carried largely by Piezo1 (Fig. 1). This result is in line with a recent report by  
616 Blythe *et al.*, also on human atrial fibroblasts.<sup>21</sup>

#### 617 4.3 BK<sub>Ca</sub> channels in human atrial fibroblasts

618 Robust BK<sub>Ca</sub> channel activity has been reported previously in 88% of human ventricular  
619 fibroblasts.<sup>57</sup> In our study, BK<sub>Ca</sub> channel activity was present in 40% of right atrial fibroblasts  
620 of AF and 66% of SR samples, showing the typical large single channel conductance ( $125.1$   
621  $\pm 4.9$  pS). BK<sub>Ca</sub> activity was observed in all patients studied. Currents were blocked by  
622 paxilline, iberiotoxin and increased in the presence of NS11021. Their open probability was  
623 increased both by elevated internal Ca<sup>2+</sup> concentrations (as previously reported for BK<sub>Ca</sub>)<sup>58</sup>  
624 and by patch excision suggesting sensitivity to cytoskeletal integrity, a known feature of BK<sub>Ca</sub>  
625 channels.<sup>53</sup> These properties confirm that the observed current is carried by BK<sub>Ca</sub> channels  
626 (Fig. 2).

627 The study is focussed on right atrial appendage tissue, which is available in the context of  
628 open-heart surgery involving extra-corporal circulation, as left atrial tissue is removed more  
629 rarely. However, both Piezo1- and BK<sub>Ca</sub>-like activities were confirmed in right and left atrial  
630 free wall tissue (Fig. S8). In these cells, single channel amplitudes for Piezo1- and BK<sub>Ca</sub>-like  
631 currents were not different from the activity of right auricular fibroblasts included in this paper  
632 (not shown), suggesting that the observations reported here are not restricted to right atrial  
633 appendage.

#### 634 4.4 Piezo1 and BK<sub>Ca</sub> currents in human atrial fibroblasts are differentially 635 remodelled during AF

636 Cells in fibrillating atria are exposed to mechanical loads that may activate SAC.  
637 Interestingly, the two channel types investigated here were altered in opposite directions  
638 (Fig. 3): whilst presence and stretch-induced activity of Piezo1 were significantly larger in AF  
639 compared to SR, consistent with an up-regulation of *PIEZO1* expression, the open probability  
640 of BK<sub>Ca</sub> channels was lower in AF compared to SR, while no differences in expression levels  
641 was detected. This change in BK<sub>Ca</sub> activity in spite of unchanged mRNA levels may be  
642 caused by modifications in trafficking, leading to diminished presence of BK<sub>Ca</sub> channels in the  
643 plasma membrane, or an alteration in the regulation of BK<sub>Ca</sub> gating.

644 Perhaps surprisingly, cells from SR and AF patients kept their respective phenotype during  
645 the first 20-28 days of primary culture. After passaging, however, Piezo1 activity was found  
646 to increase in cells from SR patients towards levels that were indistinguishable from AF cells,  
647 whilst the intrinsically higher activity in cells from AF patients remained unchanged (Fig. 3F).  
648 To avoid effects of prolonged culturing ion channel activity, we focussed our analyses on  
649 passage-0 cells. We also attempted to record from freshly isolated fibroblasts. In most cases,  
650 repeated negative pressure pulses of significant amplitude (above  $-20$  mmHg) were  
651 necessary to obtain seals, in contrast to cultured fibroblasts where seals were generally  
652 achieved by a single approach with mild suction ( $<10$  mmHg). As Piezo1 desensitizes with  
653 repeat pressure application,<sup>54</sup> freshly isolated cells were not amenable to obtaining  
654 reproducible measurements of SAC activity.

#### 655 **4.5 Piezo1 and BK<sub>Ca</sub> channels are linked functionally, but not structurally**

656 BK<sub>Ca</sub> channels in human right atrial fibroblasts increased their open probability during  
657 mechanical stimulation, applied by stretching the membrane patch in the pipette. Several  
658 lines of our experimental evidence suggest that this may, in part at least, be caused by  
659 functional crosstalk between stretch-induced activation of Piezo1 and BK<sub>Ca</sub> activity.

660 Firstly, we induced transient stretch-activation of Piezo1, followed immediately by recording  
661 BK<sub>Ca</sub> channel activity in the absence of stretch. These experiments identified BK<sub>Ca</sub> activation  
662 as related to the amplitude of the immediately preceding Piezo1 activity (Fig. 5).  
663 Desensitisation of Piezo1 during successive activation steps<sup>54</sup> reduced subsequent BK<sub>Ca</sub>  
664 activity. Similarly, when no Piezo activity was detected in a patch (rare cases), no BK<sub>Ca</sub>  
665 activation was observed either.

666 Secondly, the functional crosstalk of Piezo1 and BK<sub>Ca</sub> depends on the presence of Ca<sup>2+</sup> in  
667 the pipette solution: in the absence of extracellular Ca<sup>2+</sup>, Piezo1 currents was still detectable  
668 (non-selective cation channel), but BK<sub>Ca</sub> activation was strongly reduced (Fig. 5C and D).  
669 This suggests that a stretch-induced trans-membrane Ca<sup>2+</sup> flux via Piezo1 may increase in  
670 intracellular Ca<sup>2+</sup> concentration near BK<sub>Ca</sub> channels and activate them.

671 Thirdly, knockdown of Piezo1 (see Fig. 5F) reduced the stretch-dependent activation of BK<sub>Ca</sub>.  
672 This suppression was incomplete (to about 25% of control). This may be due to partial  
673 knockdown of Piezo1 (as shown in the inset of Fig. 5F), or to a contribution from other cation  
674 non-selective SAC. A number of other SAC, including Piezo2 (Fig. S2), and canonical  
675 transient receptor potential (TRP) channels, including TRPC3 and 6,<sup>59, 60</sup> are expressed in  
676 cardiac fibroblasts, which could influence BK<sub>Ca</sub> activity. Interestingly, Piezo1 and Piezo2 have  
677 similar expression levels (Fig. S2), although the contribution from Piezo2 to the electrical  
678 activity recorded after Piezo1 knockdown (Fig. 1F), if any, seems limited.

679 Taken together, our data suggests that the two channels are functionally coupled. Application  
680 of negative pressure to a patch, held at  $+50$  mV, will allow Ca<sup>2+</sup> entry *via* Piezo1 (the  
681 calculated calcium reversal potential, with  $2$  mmol/L Ca<sup>2+</sup> in the pipette and assuming an  
682 intracellular free Ca<sup>2+</sup> concentration of  $100$  nmol/L is  $+125$  mV). Similar connections between  
683 Ca<sup>2+</sup>-dependent K<sup>+</sup> channels and Ca<sup>2+</sup>-permeable channels, such as L-type Ca<sup>2+</sup>-channels or  
684 SAC, have been described previously,<sup>52, 61, 62</sup> but so far not in human heart cells. In addition,  
685 Piezo1-mediated calcium influx in human atrial fibroblasts has been reported,<sup>33</sup> which  
686 supports our observations.

687 This functional coupling does not seem to require protein-protein interactions (Fig. 6). It may  
688 not depend on the specific pair of proteins studied here – i.e. Piezo1 (and, possibly, other  
689 cation non-selective SAC) could influence the activity of other calcium-dependent channels,  
690 potentially making them indirectly mechano-sensitive.

691

692 Since Piezo1 is non-selective for cations,<sup>22</sup> Na<sup>+</sup> will also enter the cell during stretch-  
693 activation of Piezo1. Elevated intracellular Na<sup>+</sup> can increase intracellular Ca<sup>2+</sup> levels *via*  
694 secondary effects, such as mediated by the Na<sup>+</sup>/Ca<sup>2+</sup> exchanger.<sup>52</sup> We therefore used Ca<sup>2+</sup>-  
695 free conditions, both in the pipette and the bath solution, which would have reduced any  
696 contribution by such secondary effects.

697 While downregulation of Piezo1 and use of Ca<sup>2+</sup>-free conditions strongly reduced BK<sub>Ca</sub>  
698 channel activity, it did not completely abolish it. We interpret the remaining (roughly 25%)  
699 BK<sub>Ca</sub> channel activity as evidence for direct stretch-mediated activation of BK<sub>Ca</sub> channels.  
700 This is supported by the detection of STREX (Fig. 4F) in keeping with previous work.<sup>26, 28</sup> The  
701 lower expression of the STREX-containing variant compared to the BK<sub>Ca</sub> without STREX  
702 corresponds to the electrophysiological observations: the direct stretch-mediated activation  
703 represents only 25% of the total BK<sub>Ca</sub> stretch-induced response (Fig. 4B and F).

#### 704 4.6 Possible functional relevance

705 The role of, both, the coupling between Piezo1 and BK channels, and the differential  
706 remodelling of their activity in the context of AF, for (patho-)physiology of atrial cell and tissue  
707 remains to be identified. The resting membrane potentials of fibroblasts isolated from AF and  
708 SR patients and cultured on a static substrate did not differ, so functional contributions may  
709 need to be explored in the context of cell stretching.

710 If Piezo1 or/and BK<sub>Ca</sub> were to alter fibroblast membrane potential during stretch, this could  
711 have implications for fibroblasts biology and, possibly, have consequences for electrical  
712 excitability, refractoriness, and conduction in myocytes, as fibroblasts and cardiomyocytes  
713 can be electrotonically coupled, as demonstrated in murine heart lesions.<sup>63, 64</sup>

714 We anticipate possible contributions of Piezo1 and BK<sub>Ca</sub> channels in tissue remodelling as  
715 suggested in non AF-related context.<sup>21, 31</sup> Piezo1 expression and activity have further been  
716 proposed to contribute to the control of pro-fibrotic interleukin-6 (IL-6) expression and  
717 secretion.<sup>21</sup> The increased Piezo1 expression and activity reported here in fibroblasts from  
718 AF patients, may correspond to an increase in IL-6 signalling. Interestingly, elevated levels of  
719 IL-6 correlate with increased left atrial size (as a potential mechanical input),<sup>65</sup> and AF.<sup>66, 67</sup>

#### 720 4.7 Study limitations and future work

721 Cells recorded in this study form a mix population of fibroblasts and myofibroblasts. We did  
722 not separately quantify the percentage of myofibroblasts *versus* fibroblasts in cells from AF  
723 patients. The ratio of myofibroblasts in AF tissue may be higher, compared to control tissue.  
724 Further studies will investigate whether fibroblast-myofibroblast phenoconversion influences  
725 Piezo1 and BK<sub>Ca</sub> channels.

726 Further studies will be required to characterize other essential elements of the BK<sub>Ca</sub> channel  
727 signalling complex, as either or both of the beta or gamma subunits may be changed in the  
728 context of AF. This, together with a detailed analysis of BK<sub>Ca</sub> localisation, would help in  
729 revealing why less BK<sub>Ca</sub> activity is detected in AF fibroblasts while Piezo1 activity is higher.

730 BK<sub>Ca</sub> is obviously not the only calcium-activated conductance in fibroblasts. Analysing the  
731 effects of Piezo1 opening, for example on the calcium-activated chloride channel anoctamin-  
732 1, would be quite relevant in the context of AF, as up-regulation of that channel has been  
733 reported to prevent fibrosis after myocardial infarction.<sup>68</sup>

734  
735 In conclusion, we describe two ion channel populations in human right atrial fibroblasts  
736 whose activity is increased during stretch, either directly (Piezo1 and a subset of BK<sub>Ca</sub>  
737 channels) or indirectly (most BK<sub>Ca</sub> channels, whose activation depends on functional  
738 crosstalk with Piezo1). The two channels are differentially regulated in AF, with an increase

739 in Piezo1 activity and expression, and a down-regulation of BK<sub>Ca</sub> activity. The Patho-  
740 physiological relevance of these changes remains to be explored.

741

742

### 743 **Author Contributions**

744 DJ, AK, SNH, PK, UR and RP contributed to conception, design and interpretation of the  
745 study. DJ, AK and ED performed and analysed electrophysiological experiments. DA, EARZ,  
746 SP and CS performed and analysed quantitative RT-PCR experiments. DJ and TG  
747 performed and analysed immunocytochemical experiments. DA and ASC isolated cells. BA  
748 and HG performed and analysed the co-immunoprecipitation and localisation experiments.  
749 RE performed the PCR to assess the presence of STREX. SRK provided HAF cells. FB, CS,  
750 MK and FAK provided access to surgical tissue samples. DJ, AK, UR and RP drafted the  
751 manuscript. All authors contributed to manuscript revision, read and approved the submitted  
752 version.

753

### 754 **Funding**

755 This work was supported by the ERC Advanced Grant *CardioNECT* (project ID: #323099,  
756 PK), a research grant from the Ministry of Science, Research and Arts Baden-Württemberg  
757 (MWK-BW Sonderlinie Medizin, #3091311631), and a DFG Emmy Noether Fellowship (to  
758 EARZ, 285 #396913060). ED, PK, UR and RP acknowledge support by Amgen Inc. ED, RE,  
759 ASC, EARZ, FB, FAK, CS, PK, UR and RP are members of the Collaborative Research  
760 Centre SFB1425 of the German Research Foundation (#422681845).

### 761 **Acknowledgments**

762 The authors thank all colleagues at the Department for Cardiovascular Surgery of the  
763 University Heart Centre Freiburg - Bad Krozingen, and at the CardioVascular BioBank  
764 Freiburg, for providing access to human atrial tissue. Special thanks for technical support go  
765 to Cinthia Buchmann, Anne Hetkamp, Kristina Kollmar and Gabriele Lechner. We would like  
766 to also thank Simone Nübling and Hannah Fürniss for their help concerning patient  
767 demographics. We thank Dr Bo Bentzen (University of Copenhagen) for providing us with the  
768 compound NS11021. We acknowledge support from SCI-MED for image acquisition and  
769 analysis.

770

### 771 **Disclosures**

772 None

## 773 **References**

- 774 1. Wong CX, Brooks AG, Leong DP, Roberts-Thomson KC and Sanders P. The  
775 increasing burden of atrial fibrillation compared with heart failure and myocardial infarction: a  
776 15-year study of all hospitalizations in Australia. *Arch Int Med.* 2012;172:739-41.
- 777 2. Zulkifly H, Lip GYH and Lane DA. Epidemiology of atrial fibrillation. *Int J Clin Practice.*  
778 2018;72:e13070.
- 779 3. Staerk L, Sherer JA, Ko D, Benjamin EJ and Helm RH. Atrial Fibrillation:  
780 Epidemiology, Pathophysiology, and Clinical Outcomes. *Circ Res.* 2017;120:1501-1517.
- 781 4. Wijffels MC, Kirchhof CJ, Dorland R and Allessie MA. Atrial fibrillation begets atrial  
782 fibrillation. A study in awake chronically instrumented goats. *Circulation.* 1995;92:1954-68.
- 783 5. Dobrev D and Ravens U. Remodeling of cardiomyocyte ion channels in human atrial  
784 fibrillation. *Basic Res Cardiol.* 2003;98:137-48.
- 785 6. Kumagai K, Akimitsu S, Kawahira K, Kawanami F, Yamanouchi Y, Hiroki T and  
786 Arakawa K. Electrophysiological properties in chronic lone atrial fibrillation. *Circulation.*  
787 1991;84:1662-8.
- 788 7. Psaty BM, Manolio TA, Kuller LH, Kronmal RA, Cushman M, Fried LP, White R,  
789 Furberg CD and Rautaharju PM. Incidence of and risk factors for atrial fibrillation in older  
790 adults. *Circulation.* 1997;96:2455-61.
- 791 8. Bode F, Sachs F and Franz MR. Tarantula peptide inhibits atrial fibrillation. *Nature.*  
792 2001;409:35-6.
- 793 9. Kamkin A, Kiseleva I, Wagner KD, Leiterer KP, Theres H, Scholz H, Gunther J and  
794 Lab MJ. Mechano-electric feedback in right atrium after left ventricular infarction in rats. *J Mol*  
795 *Cell Cardiol.* 2000;32:465-77.
- 796 10. Ravelli F. Mechano-electric feedback and atrial fibrillation. *Prog Biophys Mol Biol.*  
797 2003;82:137-49.
- 798 11. Ravelli F and Allessie M. Effects of atrial dilatation on refractory period and  
799 vulnerability to atrial fibrillation in the isolated Langendorff-perfused rabbit heart. *Circulation.*  
800 1997;96:1686-95.
- 801 12. Ravelli F, Mase M, del Greco M, Marini M and Disertori M. Acute atrial dilatation  
802 slows conduction and increases AF vulnerability in the human atrium. *J Cardiovas*  
803 *Electrophysiology.* 2011;22:394-401.
- 804 13. Thanigaimani S, McLennan E, Linz D, Mahajan R, Agbaedeng TA, Lee G, Kalman  
805 JM, Sanders P and Lau DH. Progression and reversibility of stretch induced atrial  
806 remodeling: Characterization and clinical implications. *Prog Biophys Mol Biol.* 2017;130:376-  
807 386.
- 808 14. Tavi P, Han C and Weckstrom M. Mechanisms of stretch-induced changes in [Ca<sup>2+</sup>]<sub>i</sub>  
809 in rat atrial myocytes: role of increased troponin C affinity and stretch-activated ion channels.  
810 *Circ Res.* 1998;83:1165-77.
- 811 15. Nazir SA and Lab MJ. Mechanoelectric feedback and atrial arrhythmias. *Cardiovasc*  
812 *Res.* 1996;32:52-61.
- 813 16. Kaufmann R and Theophile U. Autonomously promoted extension effect in Purkinje  
814 fibers, papillary muscles and trabeculae carneae of rhesus monkeys. *Pflugers Archiv fur die*  
815 *gesamte Physiologie des Menschen und der Tiere.* 1967;297:174-89.

- 816 17. Lab MJ. Depolarization produced by mechanical changes in normal and abnormal  
817 myocardium [proceedings]. *J Physiol*. 1978;284:143p-144p.
- 818 18. Peyronnet R, Nerbonne JM and Kohl P. Cardiac Mechano-Gated Ion Channels and  
819 Arrhythmias. *Circ Res*. 2016;118:311-29.
- 820 19. Quinn TA and Kohl P. Cardiac Mechano-Electric Coupling: Acute Effects of  
821 Mechanical Stimulation on Heart Rate and Rhythm. *Physiological Reviews*. *Physiol Rev*  
822 2021/101:37–92.
- 823 20. Kamkin A, Kiseleva I, Wagner KD, Lammerich A, Bohm J, Persson PB and Gunther J.  
824 Mechanically induced potentials in fibroblasts from human right atrium. *Experimental Physiol*.  
825 1999;84:347-56.
- 826 21. Blythe NM, Muraki K, Ludlow MJ, Stylianidis V, Gilbert HTJ, Evans EL, Cuthbertson  
827 K, Foster R, Swift J, Li J, Drinkhill MJ, van Nieuwenhoven FA, Porter KE, Beech DJ and  
828 Turner NA. Mechanically activated Piezo1 channels of cardiac fibroblasts stimulate p38  
829 mitogen-activated protein kinase activity and interleukin-6 secretion. *J Biol Chem*. 2019.
- 830 22. Coste B, Mathur J, Schmidt M, Earley TJ, Ranade S, Petrus MJ, Dubin AE and  
831 Patapoutian A. Piezo1 and Piezo2 are essential components of distinct mechanically  
832 activated cation channels. *Science*. 2010;330:55-60.
- 833 23. Coste B, Xiao BL, Santos JS, Syeda R, Grandl J, Spencer KS, Kim SE, Schmidt M,  
834 Mathur J, Dubin AE, Montal M and Patapoutian A. Piezo proteins are pore-forming subunits  
835 of mechanically activated channels. *Nature*. 2012;483:176-U72.
- 836 24. Beech DJ and Kalli AC. Force sensing by piezo channels in cardiovascular health and  
837 disease. *Arteriosclerosis, thrombosis, and vascular biology*. 2019;39:2228-2239.
- 838 25. Petho Z, Najder K, Bulk E and Schwab A. Mechanosensitive ion channels push  
839 cancer progression. *Cell Calcium*. 2019;80:79-90.
- 840 26. Zhao H and Sokabe M. Tuning the mechanosensitivity of a BK channel by changing  
841 the linker length. *Cell Research*. 2008;18:871-878.
- 842 27. Iribe G, Jin H and Naruse K. Role of sarcolemmal BKCa channels in stretch-induced  
843 extrasystoles in isolated chick hearts. *Circulation Journal*. 2011;75:2552-2558.
- 844 28. Naruse K, Tang Q-Y and Sokabe M. Stress-Axis Regulated Exon (STREX) in the C  
845 terminus of BKCa channels is responsible for the stretch sensitivity. *Biochem and Biophys*  
846 *Res Com*. 2009;385:634-639.
- 847 29. Ge L, Hoa NT, Wilson Z, Arismendi-Morillo G, Kong XT, Tajhya RB, Beeton C and  
848 Jadus MR. Big Potassium (BK) ion channels in biology, disease and possible targets for  
849 cancer immunotherapy. *Int Immunopharmacol*. 2014;22:427-43.
- 850 30. Zhao H-c, Agula H, Zhang W, Wang F, Sokabe M and Li L-m. Membrane stretch and  
851 cytoplasmic Ca<sup>2+</sup> independently modulate stretch-activated BK channel activity. *J of*  
852 *Biomech*. 2010;43:3015-3019.
- 853 31. Sheng J, Shim W, Wei H, Lim SY, Liew R, Lim TS, Ong BH, Chua YL and Wong P.  
854 Hydrogen sulphide suppresses human atrial fibroblast proliferation and transformation to  
855 myofibroblasts. *J Cell Mol Med*. 2013;17:1345-1354.
- 856 32. Klesen A, Jakob D, Emig R, Kohl P, Ravens U and Peyronnet R. Cardiac fibroblasts :  
857 Active players in (atrial) electrophysiology? *Herzschrittmachertherapie & Elektrophysiologie*.  
858 2018;29:62-69.

- 859 33. Blythe NM, Muraki K, Ludlow MJ, Stylianidis V, Gilbert HT, Evans EL, Cuthbertson  
860 K, Foster R, Swift J and Li J. Mechanically activated Piezo1 channels of cardiac fibroblasts  
861 stimulate p38 mitogen-activated protein kinase activity and interleukin-6 secretion. *J Biol*  
862 *Chem.* 2019;294:17395-17408.
- 863 34. Kirchhof P, Benussi S, Kotecha D, Ahlsson A, Atar D, Casadei B, Castella M, Diener  
864 HC, Heidbuchel H, Hendriks J, Hindricks G, Manolis AS, Oldgren J, Popescu BA, Schotten  
865 U, Van Putte B, Vardas P, Agewall S, Camm J, Baron Esquivias G, Budts W, Carerj S,  
866 Casselman F, Coca A, De Caterina R, Deftereos S, Dobrev D, Ferro JM, Filippatos G,  
867 Fitzsimons D, Gorenek B, Guenoun M, Hohnloser SH, Kolh P, Lip GY, Manolis A, McMurray  
868 J, Ponikowski P, Rosenhek R, Ruschitzka F, Savelieva I, Sharma S, Suwalski P, Tamargo  
869 JL, Taylor CJ, Van Gelder IC, Voors AA, Windecker S, Zamorano JL and Zeppenfeld K. 2016  
870 ESC Guidelines for the management of atrial fibrillation developed in collaboration with  
871 EACTS. *Europace.* 2016;18:1609-1678.
- 872 35. Poulet C, Kunzel S, Buttner E, Lindner D, Westermann D and Ravens U. Altered  
873 physiological functions and ion currents in atrial fibroblasts from patients with chronic atrial  
874 fibrillation. *Physiol Rep.* 2016;4.
- 875 36. Künzel SR, Rausch JS, Schäffer C, Hoffmann M, Künzel K, Klapproth E, Kant T,  
876 Herzog N, Küpper JH and Lorenz K. Modeling atrial fibrosis in vitro—Generation and  
877 characterization of a novel human atrial fibroblast cell line. *FEBS Open Bio.* 2020;10:1210-  
878 1218.
- 879 37. Isenberg G and Klockner U. Calcium tolerant ventricular myocytes prepared by  
880 preincubation in a "KB medium". *Pflugers Archiv : European J Physiol.* 1982;395:6-18.
- 881 38. Phansalkar N, More S, Sabale A and Joshi MS. Adaptive local thresholding for  
882 detection of nuclei in diversity stained cytology images. In 2011 International Conference on  
883 Communications and Signal Processing (pp. 218-220). IEEE.
- 884 International Conference on Communications and Signal Processing. 2011;IEEE:218-220.
- 885 39. Peyronnet R, Martins JR, Duprat F, Demolombe S, Arhatte M, Jodar M, Tauc M,  
886 Durantou C, Paulais M, Teulon J, Honore E and Patel A. Piezo1-dependent stretch-activated  
887 channels are inhibited by Polycystin-2 in renal tubular epithelial cells. *EMBO reports.*  
888 2013;14:1143-8.
- 889 40. Hamill OP and McBride DW, Jr. The pharmacology of mechanogated membrane ion  
890 channels. *Pharmacol Reviews.* 1996;48:231-52.
- 891 41. Bae C, Sachs F and Gottlieb PA. The mechanosensitive ion channel Piezo1 is  
892 inhibited by the peptide GsMTx4. *Biochemistry.* 2011;50:6295-300.
- 893 42. Li H, Xu J, Shen Z-S, Wang G-M, Tang M, Du X-R, Lv Y-T, Wang J-J, Zhang F-F and  
894 Qi Z. The neuropeptide GsMTx4 inhibits a mechanosensitive BK channel through the  
895 voltage-dependent modification specific to mechano-gating. *J Biol Chem.* 2019;294:11892-  
896 11909.
- 897 43. Schmidt C, Wiedmann F, Zhou XB, Heijman J, Voigt N, Ratte A, Lang S, Kallenberger  
898 SM, Campana C, Weymann A, De Simone R, Szabo G, Ruhparwar A, Kallenbach K, Karck  
899 M, Ehrlich JR, Baczko I, Borggrefe M, Ravens U, Dobrev D, Katus HA and Thomas D.  
900 Inverse remodelling of K2P3.1 K<sup>+</sup> channel expression and action potential duration in left  
901 ventricular dysfunction and atrial fibrillation: implications for patient-specific antiarrhythmic  
902 drug therapy. *Eur Heart J.* 2017;38:1764-1774.
- 903 44. Sanchez M and McManus O. Paxilline inhibition of the alpha-subunit of the high-  
904 conductance calcium-activated potassium channel. *Neuropharmacology.* 1996;35:963-968.

- 905 45. Zhou Y and Lingle CJ. Paxilline inhibits BK channels by an almost exclusively  
906 closed-channel block mechanism. *J Gen Physiol.* 2014;144:415-40.
- 907 46. Candia S, Garcia ML and Latorre R. Mode of action of iberiotoxin, a potent blocker of  
908 the large conductance Ca (2+)-activated K<sup>+</sup> channel. *Biophys J.* 1992;63:583-590.
- 909 47. Bentzen BH, Nardi A, Calloe K, Madsen LS, Olesen SP and Grunnet M. The small  
910 molecule NS11021 is a potent and specific activator of Ca<sup>2+</sup>-activated big-conductance K<sup>+</sup>  
911 channels. *Mol Pharmacol.* 2007;72:1033-44.
- 912 48. Gottlieb PA and Sachs F. Piezo1: properties of a cation selective mechanical  
913 channel. *Channels (Austin, Tex).* 2012;6:214-9.
- 914 49. Maqoud F, Cetrone M, Mele A and Tricarico D. Molecular structure and function of big  
915 calcium-activated potassium channels in skeletal muscle: pharmacological perspectives.  
916 *Physiological genomics.* 2017;49:306-317.
- 917 50. Takahashi K and Naruse K. Stretch-activated BK channel and heart function. *Prog*  
918 *Biophys Mol Biol.* 2012;110:239-44.
- 919 51. Taniguchi J and Guggino WB. Membrane stretch: a physiological stimulator of Ca<sup>2+</sup>-  
920 activated K<sup>+</sup> channels in thick ascending limb. *Am J Physiol.* 1989;257:F347-52.
- 921 52. Iribe G, Jin H, Kaihara K and Naruse K. Effects of axial stretch on sarcolemmal BKCa  
922 channels in post-hatch chick ventricular myocytes. *Experimental Physiology.* 2010;95:699-  
923 711.
- 924 53. Ehrhardt AG, Frankish N and Isenberg G. A large-conductance K<sup>+</sup> channel that is  
925 inhibited by the cytoskeleton in the smooth muscle cell line DDT1 MF-2. *Journal Physiol.*  
926 1996;496:663-676.
- 927 54. Lewis AH, Cui AF, McDonald MF and Grandl J. Transduction of repetitive mechanical  
928 stimuli by Piezo1 and Piezo2 ion channels. *Cell reports.* 2017;19:2572-2585.
- 929 55. Jha S and Dryer SE. The β1 subunit of Na<sup>+</sup>/K<sup>+</sup>-ATPase interacts with BKCa channels  
930 and affects their steady-state expression on the cell surface. *FEBS letters.* 2009;583:3109-  
931 3114.
- 932 56. Baum J and Duffy HS. Fibroblasts and myofibroblasts: what are we talking about?  
933 *Journal Cardiovasc Pharmacol.* 2011;57:376-9.
- 934 57. Li GR, Sun HY, Chen JB, Zhou Y, Tse HF and Lau CP. Characterization of multiple  
935 ion channels in cultured human cardiac fibroblasts. *PloS One.* 2009;4:e7307.
- 936 58. Cui J, Yang H and Lee US. Molecular mechanisms of BK channel activation. *Cell Mol*  
937 *Life Sci.* 2009;66:852-875.
- 938 59. Han L and Li J. Canonical transient receptor potential 3 channels in atrial fibrillation.  
939 *European J of Pharmacol.* 2018;837:1-7.
- 940 60. Davis J, Burr AR, Davis GF, Birnbaumer L and Molkenin JD. A TRPC6-dependent  
941 pathway for myofibroblast transdifferentiation and wound healing in vivo. *Developmental cell.*  
942 2012;23:705-715.
- 943 61. Cahalan SM, Lukacs V, Ranade SS, Chien S, Bandell M and Patapoutian A. Piezo1  
944 links mechanical forces to red blood cell volume. *eLife.* 2015;4.
- 945 62. Marcantoni A, Vandael DH, Mahapatra S, Carabelli V, Sinnegger-Brauns MJ,  
946 Striessnig J and Carbone E. Loss of Cav1.3 channels reveals the critical role of L-type and

- 947 BK channel coupling in pacemaking mouse adrenal chromaffin cells. *J Neurosci.*  
948 2010;30:491-504.
- 949 63. Quinn TA, Camelliti P, Rog-Zielinska EA, Siedlecka U, Poggioli T, O'Toole ET,  
950 Knöpfel T and Kohl P. Electrotonic coupling of excitable and nonexcitable cells in the heart  
951 revealed by optogenetics. *Proc Nat Acad Sci.* 2016;113:14852-14857.
- 952 64. Rubart M, Tao W, Lu X-L, Conway SJ, Reuter SP, Lin S-F and Soonpaa MH.  
953 Electrical coupling between ventricular myocytes and myofibroblasts in the infarcted mouse  
954 heart. *Cardiovasc Res.* 2018;114:389-400.
- 955 65. Psychari SN, Apostolou TS, Sinos L, Hamodraka E, Liakos G and Kremastinos DT.  
956 Relation of elevated C-reactive protein and interleukin-6 levels to left atrial size and duration  
957 of episodes in patients with atrial fibrillation. *Am J Cardiol.* 2005;95:764-767.
- 958 66. Marcus GM, Whooley MA, Glidden DV, Pawlikowska L, Zaroff JG and Olgin JE.  
959 Interleukin-6 and atrial fibrillation in patients with coronary artery disease: data from the Heart  
960 and Soul Study. *American Heart J.* 2008;155:303-309.
- 961 67. Grymonprez M, Vakaet V, Kavousi M, Stricker BH, Ikram MA, Heeringa JJ, Franco  
962 OH, Brusselle GG and Lahousse L. The role of interleukin 6 on incident atrial fibrillation in  
963 COPD patients. 2018.
- 964 68. Gao Y, Zhang YM, Qian LJ, Chu M, Hong J and Xu D. ANO1 inhibits cardiac fibrosis  
965 after myocardial infraction via TGF- $\beta$ /smad3 pathway. *Scientific Reports.* 2017;7:1-9.
- 966
- 967
